# Supplementary material
Source: MDPI journal article supplement (https://www.mdpi.com/2076-3417/11/20/9688)
Supplement: s1 [file s1]

# Supplementary Materials: Evaluating the Checklist for Artificial Intelligence in Medical Imaging (CLAIM)-based Quality of Reports Using Convolutional Neural Network for Odontogenic Cyst and Tumor Detection

Van Nhat Thang Le <sup>1,2,3,4</sup>, Jae-Gon Kim <sup>1,2,3</sup>, Yeon-Mi Yang <sup>1,2,3</sup> and Dae-Woo Lee <sup>1,2,3,\*</sup>

**Table 1.** Detailed search strategies for each database. Mesh terms, search terms, and combinations of the two were used for each database search.

| Database       | Detailed search strategies                                                                                                                                                                                                                                                             | Studies founded |
|----------------|----------------------------------------------------------------------------------------------------------------------------------------------------------------------------------------------------------------------------------------------------------------------------------------|-----------------|
| PubMed         | ("deep learning"[MeSH Terms] OR deep learning[Text Word] OR convolution neural network[Text Word] OR convolution neural networks[Text Word]) AND ("odontogenic tumors"[MeSH Terms] OR odontogenic tumor[Text Word] OR "odontogenic cysts"[MeSH Terms] OR odontogenic cysts[Text Word]) | 4               |
| EMBASE         | ('deep learning' OR 'convolutional neural network') AND ('odontogenic tumor' OR 'odontogenic cyst')                                                                                                                                                                                    | 5               |
| SCOPUS         | ALL ("deep learning" OR "convolution neural network" OR "convolution neural networks") AND ALL (tumor OR tumors OR cysts OR cyst) AND ALL (odontogenic)                                                                                                                                | 41              |
| Web of Science | ALL FIELDS: ("deep learning" OR "convolution neural network" OR "convolution neural networks") AND ALL FIELDS: (tumor OR tumors OR cysts OR cyst) AND ALL FIELDS: (odontogenic)                                                                                                        | 5               |

Ultimately, 55 records were found, 4 from PubMed, 5 from EMBASE, 41 from Scopus, and 5 from the Web of Science. Studies were further selected according to the inclusion criteria listed in the Material and Methods (Figure 1).

**Table 2.** Evaluating the CLAIM-based quality of CNN reports for odontogenic cyst and tumor detection.

| Section/topic                | No. | Checklist item - yes if reported                                                                                                                                                                                        | Liu<br>et al. | Kwon<br>et al. | Yang<br>et al. | Ariji<br>et al. | Lee<br>et<br>al. | Poedjiastoeti<br>et al. | No. (%) of<br>reports (n =<br>6) |
|------------------------------|-----|-------------------------------------------------------------------------------------------------------------------------------------------------------------------------------------------------------------------------|---------------|----------------|----------------|-----------------|------------------|-------------------------|----------------------------------|
| <b>TITLE or<br/>ABSTRACT</b> |     |                                                                                                                                                                                                                         |               |                |                |                 |                  |                         |                                  |
|                              | 1   | Identification as a study of AI methodology, specifying the category of technology used (e.g., deep learning)                                                                                                           | 1             | 1              | 1              | 1               | 1                | 1                       | 6 (100%)                         |
| <b>ABSTRACT</b>              |     |                                                                                                                                                                                                                         |               |                |                |                 |                  |                         |                                  |
| Structured summary           | 2   | Structured summary of the study design, methods, results, and conclusions                                                                                                                                               | 0             | 1              | 1              | 1               | 0                | 1                       | 4 (67%)                          |
| <b>INTRODUCTION</b>          |     |                                                                                                                                                                                                                         |               |                |                |                 |                  |                         |                                  |
| Rationale                    | 3   | Scientific and clinical background, including the intended use and clinical role of the AI approach                                                                                                                     | 1             | 1              | 1              | 1               | 1                | 1                       | 6 (100%)                         |
| Objectives                   | 4   | Study objectives and hypotheses                                                                                                                                                                                         | 1             | 1              | 1              | 1               | 1                | 1                       | 6 (100%)                         |
| <b>METHODS</b>               |     |                                                                                                                                                                                                                         |               |                |                |                 |                  |                         |                                  |
| Study design                 | 5   | Prospective or retrospective study                                                                                                                                                                                      | 1             | 1              | 1              | 1               | 1                | 1                       | 6 (100%)                         |
|                              | 6   | Study goal, such as model creation, exploratory study, feasibility study, noninferiority trial                                                                                                                          | 0             | 0              | 0              | 0               | 0                | 0                       | 0 (0%)                           |
| Data                         | 7   | Data sources                                                                                                                                                                                                            | 0             | 1              | 1              | 1               | 1                | 1                       | 5 (83%)                          |
|                              | 8   | Eligibility criteria: how, where, and when potentially eligible participants or studies were identified (e.g., symptoms, results from previous tests, inclusion in registry, patient-care setting, location, and dates) | 0             | 0              | 1              | 1               | 1                | 0                       | 3 (50%)                          |
|                              | 9   | Data pre-processing steps                                                                                                                                                                                               | 1             | 1              | 0              | 1               | 1                | 1                       | 5 (83%)                          |
|                              | 10  | Selection of data subsets, if applicable                                                                                                                                                                                | 1             | 1              | 1              | 1               | 1                | 1                       | 6 (100%)                         |
|                              | 11  | Definitions of data elements, with references to common data elements                                                                                                                                                   | 0             | 0              | 0              | 0               | 0                | 0                       | 0 (0%)                           |
|                              | 12  | De-identification methods                                                                                                                                                                                               | 0             | 0              | 0              | 0               | 0                | 0                       | 0 (0%)                           |
|                              | 13  | How missing data were handled                                                                                                                                                                                           | 0             | 0              | 0              | 0               | 0                | 0                       | 0 (0%)                           |

|                 |    |                                                                                                                 |   |   |   |   |   |   |          |
|-----------------|----|-----------------------------------------------------------------------------------------------------------------|---|---|---|---|---|---|----------|
| Ground truth    | 14 | Definition of the ground truth reference standard, in sufficient detail to allow replication                    | 0 | 0 | 0 | 0 | 0 | 0 | 0 (0%)   |
|                 | 15 | Rationale for choosing the reference standard (if alternatives exist)                                           | 0 | 0 | 0 | 0 | 0 | 0 | 0 (0%)   |
|                 | 16 | Source of ground truth annotations; qualifications and preparation of annotators                                | 0 | 1 | 0 | 0 | 1 | 1 | 3 (50%)  |
|                 | 17 | Annotation tools                                                                                                | 0 | 1 | 0 | 1 | 0 | 0 | 2 (33%)  |
| Data partitions | 18 | Measurement of inter- and intra-rater variability; methods to mitigate variability and/or resolve discrepancies | 0 | 0 | 0 | 0 | 0 | 0 | 0 (0%)   |
|                 | 19 | Intended sample size and how it was determined                                                                  | 1 | 1 | 1 | 1 | 1 | 1 | 6 (100%) |
|                 | 20 | How data were assigned to partitions; specify proportions                                                       | 1 | 1 | 1 | 0 | 1 | 1 | 5 (83%)  |
|                 | 21 | Level at which partitions are disjoint (e.g., image, study, patient, institution)                               | 0 | 0 | 0 | 0 | 0 | 0 | 0 (0%)   |
| Model           | 22 | Detailed description of model, including inputs, outputs, all intermediate layers and connections               | 1 | 1 | 1 | 1 | 1 | 1 | 6 (100%) |
|                 | 23 | Software libraries, frameworks, and packages                                                                    | 1 | 0 | 1 | 1 | 1 | 0 | 4 (67%)  |
|                 | 24 | Initialization of model parameters (e.g., randomization, transfer learning)                                     | 1 | 0 | 0 | 0 | 1 | 1 | 3 (50%)  |
| Training        | 25 | Details of training approach, including data augmentation, hyperparameters, and number of models trained        | 1 | 1 | 1 | 1 | 1 | 1 | 6 (100%) |
|                 | 26 | Method of selecting the final model                                                                             | 0 | 1 | 0 | 0 | 0 | 0 | 1 (17%)  |
|                 | 27 | Ensembling techniques, if applicable                                                                            | 1 | 0 | 0 | 0 | 0 | 1 | 2 (33%)  |
| Evaluation      | 28 | Metrics of model performance                                                                                    | 0 | 1 | 1 | 1 | 1 | 1 | 5 (83%)  |
|                 | 29 | Statistical measures of significance and uncertainty (e.g., confidence intervals)                               | 0 | 0 | 1 | 0 | 1 | 1 | 3 (50%)  |
|                 | 30 | Robustness or sensitivity analysis                                                                              | 0 | 1 | 0 | 1 | 1 | 1 | 4 (67%)  |
|                 | 31 | Methods of explainability or interpretability (e.g., saliency maps) and how they were validated                 | 0 | 0 | 0 | 1 | 0 | 0 | 1 (17%)  |
|                 | 32 | Validation or testing on external data                                                                          | 1 | 1 | 1 | 1 | 1 | 1 | 6 (100%) |
| <b>RESULTS</b>  |    |                                                                                                                 |   |   |   |   |   |   |          |

|                          |                                                                                            |   |   |   |   |   |   |          |
|--------------------------|--------------------------------------------------------------------------------------------|---|---|---|---|---|---|----------|
| 33                       | Flow of participants or cases, using a diagram to indicate inclusion and exclusion         | 0 | 0 | 1 | 0 | 0 | 0 | 1 (17%)  |
| 34                       | Demographic and clinical characteristics of cases in each partition                        | 0 | 0 | 1 | 1 | 1 | 0 | 3 (50%)  |
| 35                       | Performance metrics for optimal model(s) on all data partitions                            | 1 | 1 | 1 | 1 | 1 | 1 | 6 (100%) |
| 36                       | Estimates of diagnostic accuracy and their precision (such as 95% confidence intervals)    | 1 | 1 | 1 | 0 | 1 | 1 | 5 (83%)  |
| 37                       | Failure analysis of incorrectly classified cases                                           | 0 | 1 | 1 | 1 | 1 | 1 | 5 (83%)  |
| <b>DISCUSSION</b>        |                                                                                            |   |   |   |   |   |   |          |
| 38                       | Study limitations, including potential bias, statistical uncertainty, and generalizability | 0 | 1 | 1 | 1 | 1 | 1 | 5 (83%)  |
| 39                       | Implications for practice, including the intended use and/or clinical role                 | 1 | 1 | 1 | 1 | 1 | 1 | 6 (100%) |
| <b>OTHER INFORMATION</b> |                                                                                            |   |   |   |   |   |   |          |
| 40                       | Registration number and name of registry                                                   | 0 | 0 | 0 | 0 | 0 | 0 | 0 (0%)   |
| 41                       | Where the full study protocol can be accessed                                              | 0 | 0 | 0 | 0 | 0 | 0 | 0 (0%)   |
| 42                       | Sources of funding and other support; role of the funders                                  | 1 | 1 | 1 | 0 | 1 | 0 | 4 (67%)  |

Data are presented as number (%) of reports featuring the corresponding item.
